# Supplementary material for: The MRPS18-2 protein levels correlate with prostate tumor progression and it induces CXCR4-dependent migration of cancer cells
Source: PubMed Central journal article supplement (PMC5797078; doi:10.1038/s41598-018-20765-8), 2018-02-02
Supplement: 41598_2018_20765_MOESM1_ESM.pdf [file 41598_2018_20765_MOESM1_ESM.pdf]

**The MRPS18-2 protein levels correlate with prostate tumor progression  
and it induces CXCR4-dependent migration of cancer cells**

Muhammad Mushtaq, Lasse Jensen, Sabina Davidsson, Oleksandr V Grygoruk, Ove  
Andrén<sup>3</sup>, Vladimir Kashuba, Elena Kashuba

**Supplementary Information**

**Table S1. Description of prostate samples**

| <b>Number</b> | <b>Diagnosis, based on HE staining</b> | <b>Gleason score</b> | <b>Additional information</b>                                                                                 |
|---------------|----------------------------------------|----------------------|---------------------------------------------------------------------------------------------------------------|
| 1             | Cancer                                 | 3+3                  | Inflammation                                                                                                  |
| 2             | Cancer                                 | 3+3                  | A part of urethral gland is present                                                                           |
| 3             | Cancer                                 | 3+4                  |                                                                                                               |
| 4             | Cancer                                 | 4+4                  | Low differentiated cancer; small glands; cribriform glands. There are areas with hyperplasia and inflammation |
| 5             | Cancer                                 | 3+4                  |                                                                                                               |
| 6             | Cancer                                 | 3+4                  |                                                                                                               |
| 7             | Cancer                                 | 2+3                  | Stage I; highly differentiated cancer                                                                         |
| 8             | Cancer                                 | 5+5                  | Stage IV; low differentiated cancer                                                                           |
| 9             | Cancer                                 | 3+4                  |                                                                                                               |
| 10            | Cancer                                 | 3+3                  | There is area with microcarcinoma (approximately 1 mm in diameter); inflammation                              |
| 11            | Cancer                                 | 3+3                  | There is the urethral part                                                                                    |
| 12            | Cancer                                 | 3+4                  | There are areas of sclerosis and the gland atrophy; a calcinated secret in atrophyc glands                    |
| 13            | Hyperplasia                            | NA*                  |                                                                                                               |
| 14            | Hyperplasia                            | NA                   | A little of inflammation                                                                                      |
| 15            | Hyperplasia                            | NA                   | There are areas with the epithelium                                                                           |

|    |             |    |                                                                    |
|----|-------------|----|--------------------------------------------------------------------|
|    |             |    | of urethra                                                         |
| 16 | Hyperplasia | NA | Combined glandular-fibrotic hyperplasia                            |
| 17 | Hyperplasia | NA | There is the gland atrophy                                         |
| 18 | Hyperplasia | NA | There is area with microcarcinoma (approximately 1 mm in diameter) |
| 19 | Hyperplasia | NA | Inflammation; cancer in urethral part                              |
| 20 | Hyperplasia | NA | There are areas with the epithelium of urethra                     |
| 21 | Hyperplasia | NA | There is the gland atrophy and the epithelium of urethra           |
| 22 | Hyperplasia | NA | There is areas with the epithelium of urethra                      |
| 23 | Stroma      | NA | Cancer in urethral part                                            |

\* NA – not applicable

**Figure S1. mRNA expression level of S18-2 in prostate cancer**

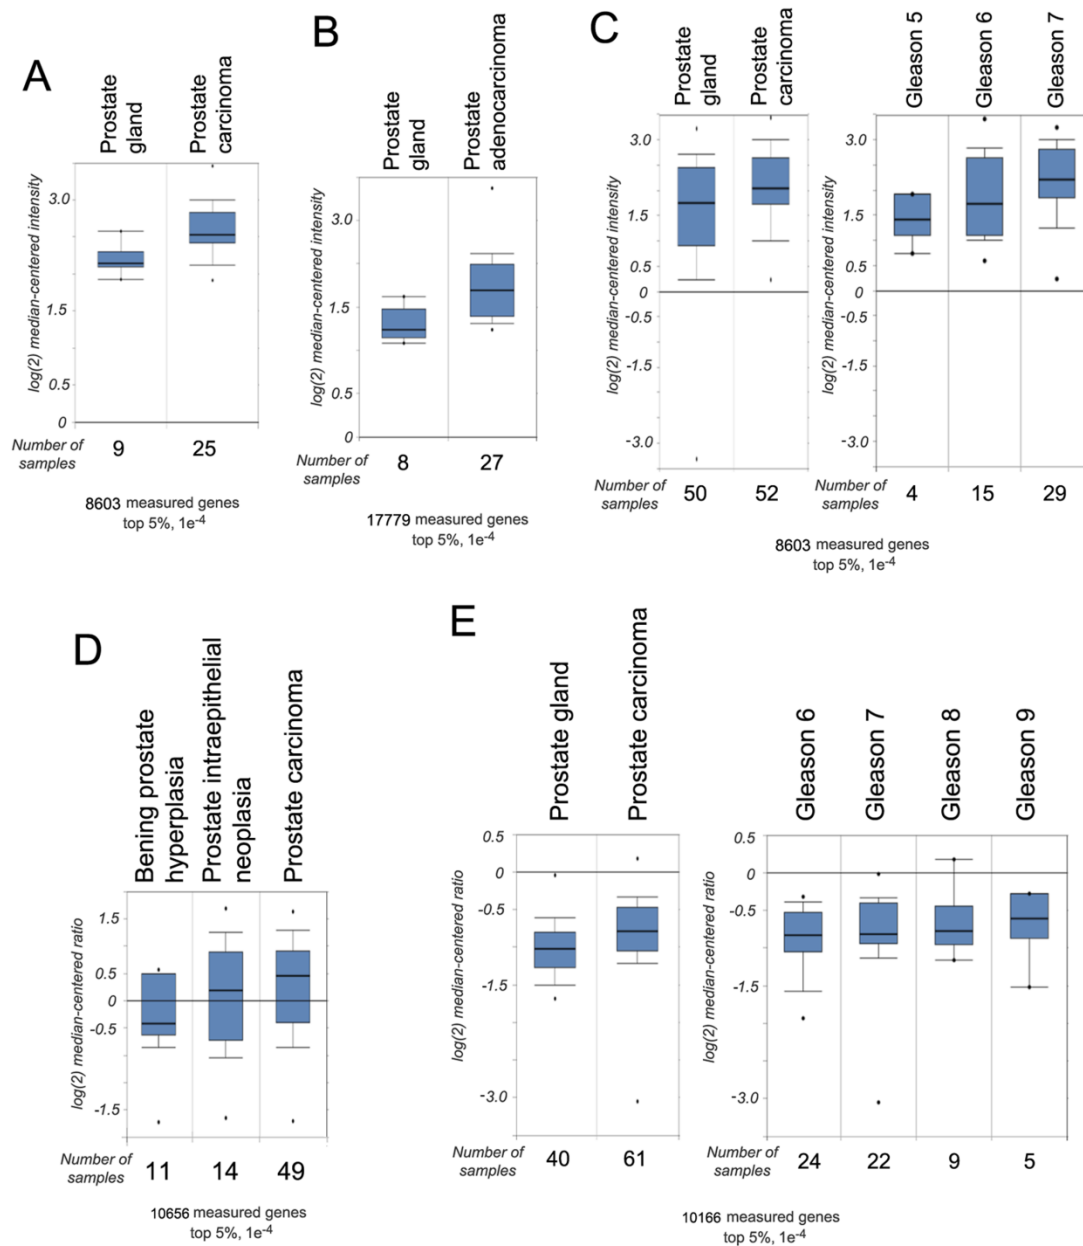

**Figure S1.** Expression analysis was performed with the help of Oncomine database. Expression of S18-2 is higher in PCa, compared with normal prostate gland (A-E). The data presented in (A) was described in <sup>1</sup>; (B) - in <sup>2</sup>; (C) - in <sup>3</sup>; (D) – in <sup>4</sup> and (E)- in <sup>5</sup>.

**Figure S2. Original gels of western blotting**

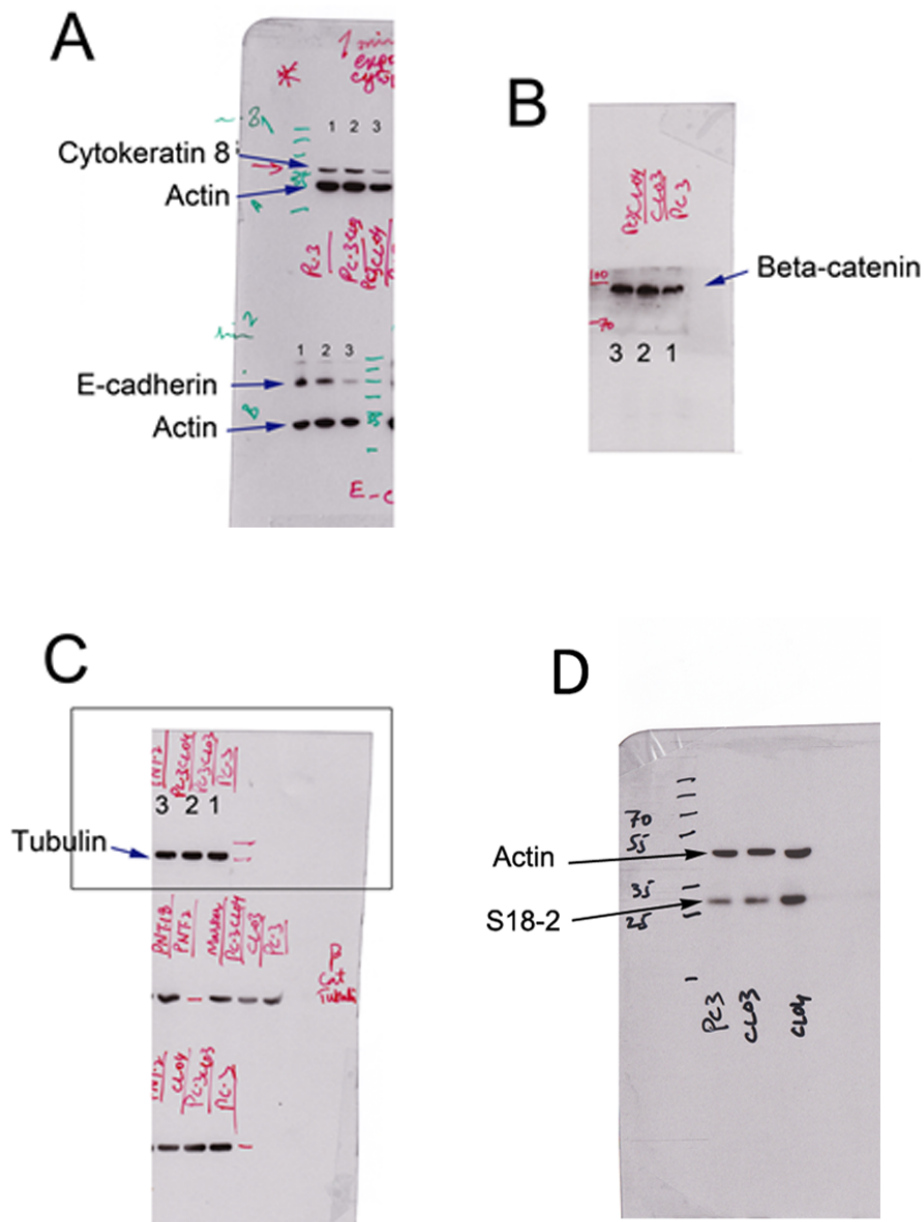

**Figure S2. Original images of western blot analysis of EMT induction markers.** Images were developed on a photofilm and scanned for presentation. In the Figure, lane (1) represents PC3, (2) - PC3-S18-2-CL03 and (3) - PC3-S18-2-CL04. **(A)** The 1<sup>st</sup> and 2<sup>nd</sup> rows of bands represent expression of cytokeratin 8 and actin (a loading control), respectively. The 3<sup>rd</sup> and 4<sup>th</sup> row of bands show the expression of E-cadherin and actin, respectively. **(B)** The expression levels of  $\beta$ -catenin. **(C)** The loading control for (B), tubulin is indicated within a square. **(D)** Expression level of S18-2 and its loading control actin.

**Figure S3. Expression of genes, assessed by q-PCR**

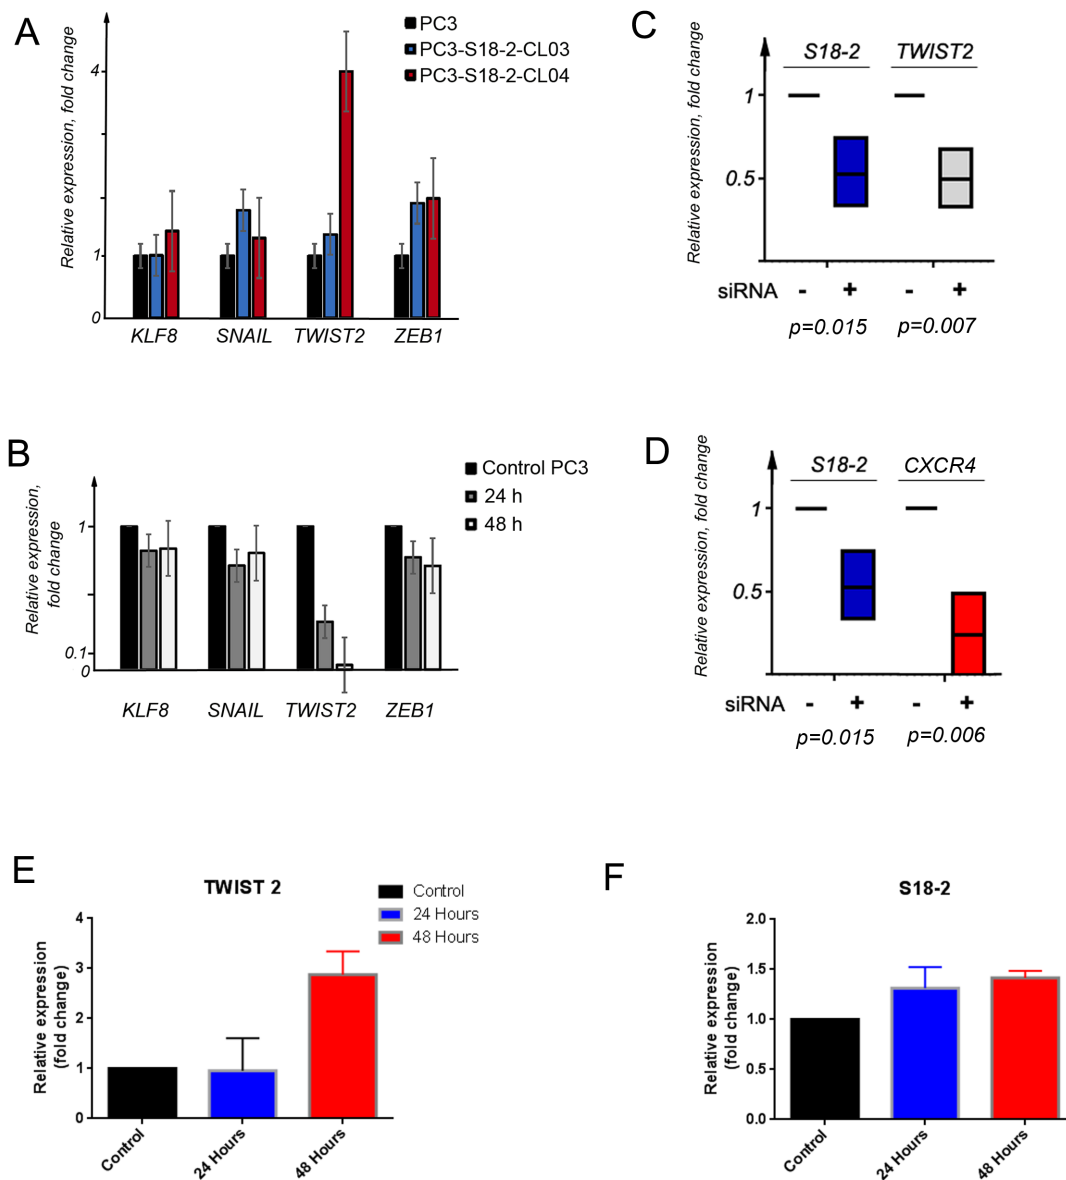

**Figure S3. Expression of genes, assessed by q-PCR.** For each gene, 3 reactions (each in triplicates) were run and a standard deviation was calculated. **(A)** The qPCR analysis of the indicated genes involved in EMT. q-PCR analysis showed that *TWIST2* was expressed at significantly higher levels in PC3-S18-2-CL04 than in the control cells. **(B)** The analysis of the expression pattern of the indicated transcription factors related to EMT at the mRNA level by q-PCR. The treatment during 24 h resulted in decreased *TWIST2* levels, and after 48 h *TWIST2* mRNA was below detection level. **(C)** The q-PCR analysis of *S18-2* and *TWIST2* expression. Three different siRNA transfections and three q-PCR reactions were performed

for each gene after 24 h. Medians of three q-PCR reactions were analyzed, using the GraphPad Prism software (version 7, GraphPad Software, La Jolla, CA, USA). The unpaired t test was applied to six values for each gene (controls - 3, siRNA – 3). **(D)** – as (C), but for the *CXCR4* gene. **(E)** The mRNA expression level of *TWIST2* after activation of CXCR4 by CXCL12 treatment. Cells were treated for 24 and 48 h. All the experiments were repeated at least three times. Medians of three q-PCR reactions were analyzed, using the GraphPad Prism software. **(F)** – as (E), but for *SI8-2*.

## References

- 1 Welsh, J. B. *et al.* Analysis of gene expression identifies candidate markers and pharmacological targets in prostate cancer. *Cancer research* **61**, 5974-5978 (2001).
- 2 Vanaja, D. K., Chevillet, J. C., Iturria, S. J. & Young, C. Y. Transcriptional silencing of zinc finger protein 185 identified by expression profiling is associated with prostate cancer progression. *Cancer research* **63**, 3877-3882 (2003).
- 3 Singh, D. *et al.* Gene expression correlates of clinical prostate cancer behavior. *Cancer cell* **1**, 203-209 (2002).
- 4 Tomlins, S. A. *et al.* Integrative molecular concept modeling of prostate cancer progression. *Nature genetics* **39**, 41-51, doi:10.1038/ng1935 (2007).
- 5 Lapointe, J. *et al.* Gene expression profiling identifies clinically relevant subtypes of prostate cancer. *Proceedings of the National Academy of Sciences of the United States of America* **101**, 811-816, doi:10.1073/pnas.0304146101 (2004).
